# Supplementary material for: Plasma and cerebrospinal fluid cholesterol esterification is hampered in Alzheimer’s disease
Source: Springer Nature journal article supplement (doi:10.1186/s13195-023-01241-6), 2023-05-20
Supplement: MOESM1 [file 25385876]

# **Plasma and cerebrospinal fluid cholesterol esterification is hampered in Alzheimer's Disease**

Marta Turri<sup>1</sup>, Elisa Conti<sup>2</sup>, Chiara Pavanello<sup>1</sup>, Francesco Gastoldi<sup>1</sup>, Marcella Palumbo<sup>3</sup>, Franco Bernini<sup>3</sup>, Vittoria Aprea<sup>2</sup>, Francesca Re<sup>4</sup>, Alberto Barbiroli<sup>5</sup>, Davide Emide<sup>5</sup>, Daniela Galimberti<sup>6,7</sup>, Lucio Tremolizzo<sup>2\*</sup>, Francesca Zimetti<sup>3\*</sup>, Laura Calabresi<sup>1\*</sup>; AGAINST-AD Group

<sup>1</sup>Centro E. Grossi Paoletti, Dipartimento di Scienze Farmacologiche e Biomolecolari, Università degli Studi di Milano, Milano, Italy; <sup>2</sup>Neurology Unit, IRCCS “San Gerardo dei Tintori”, Monza and University of Milano-Bicocca, Italy; <sup>3</sup>Department of Food and Drug, University of Parma, Parma, Italy; <sup>4</sup>School of Medicine and Surgery, University of Milano-Bicocca, Italy; <sup>5</sup>Dipartimento di Scienze per gli Alimenti, la Nutrizione e l’Ambiente, Università degli Studi di Milano, Italy; <sup>6</sup>Department of Biomedical, Surgical and Dental Sciences, University of Milan, Italy; <sup>7</sup>Fondazione IRCCS Ca’ Granda, Ospedale Policlinico, Milan, Italy

\*These authors equally contributed

Corresponding author:

Laura Calabresi, PhD

Center Grossi Paoletti, Department of Pharmacological and Biomolecular Sciences, University of Milano

Via Balzaretti 9, 20133 Milano, Italy

Phone: +390250319906

Fax: +390250319900

E-mail: [laura.calabresi@unimi.it](mailto:laura.calabresi@unimi.it)

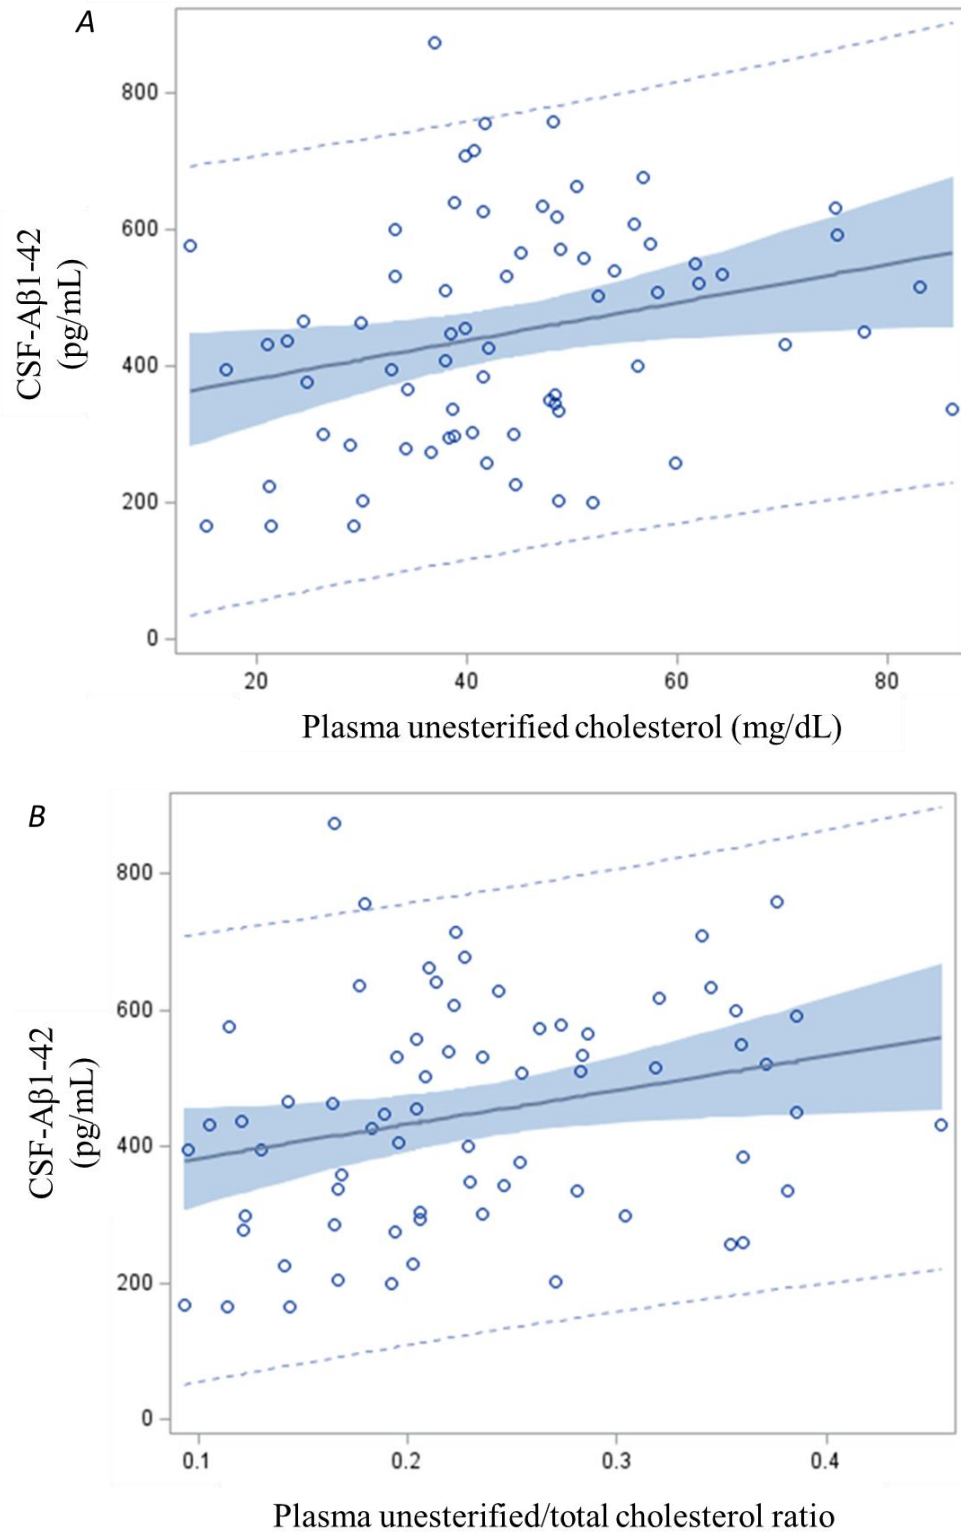

**Supplementary Fig. 1.** Correlation plot between CSF-A $\beta$ <sub>1-42</sub> and plasma unesterified cholesterol (*panel A*) and between CSF-A $\beta$ <sub>1-42</sub> and unesterified/total cholesterol ratio (*panel B*) in AD patients. Confidence interval set at 95% (shadowed area) and reference line (dashed interval). Correlation coefficient is  $R=0.31$ ,  $p=0.010$  for *A* and  $R=0.29$ ,  $p=0.016$  for *B*.
